1 **Multi-hierarchical Profiling the Structure-Activity Relationships of**  
2 **Engineered Nanomaterials at Nano-Bio Interfaces**

3 *Xiaoming Cai*<sup>§</sup>, *Jun Dong*<sup>‡</sup>, *Jing Liu*<sup>#</sup>, *Huizhen Zheng*<sup>†</sup>, *Chitrada Kaweeteerawat*<sup>⊥</sup>,  
4 *Fangjun Wang*<sup>#</sup>, *Zhaoxia Ji*<sup>◇‡\*</sup>, *Ruibin Li*<sup>†\*</sup>

5

6 <sup>†</sup>School for Radiological and interdisciplinary Sciences (RAD-X), Collaborative  
7 Innovation Center of Radiological Medicine of Jiangsu Higher Education Institutions,  
8 Jiangsu Provincial Key Laboratory of Radiation Medicine and Protection, State Key  
9 Laboratory of Radiation Medicine and Protection, Soochow University, Suzhou  
10 215123, China;

11 <sup>§</sup>Center for Genetic Epidemiology and Genomics, School of Public Health, Jiangsu  
12 Key Laboratory of Preventive and Translational Medicine for Geriatric Diseases,  
13 Medical College of Soochow University, Suzhou, Jiangsu 215123, P. R. China;

14 <sup>#</sup>CAS Key Laboratory of Separation Sciences for Analytical Chemistry, National  
15 Chromatographic R&A Center, Dalian Institute of Chemical Physics, Chinese  
16 Academy of Sciences (CAS), Dalian 116023, China;

17 <sup>‡</sup>Institute of Environmental and Food Safety, Wuhan Academy of Agricultural  
18 Science and Technology, Wuhan, Hubei 430000, China;

19 <sup>⊥</sup>California NanoSystems Institute, University of California Los Angeles, California  
20 90095, United States;

21 <sup>◇</sup> Living Proof, Inc., Cambridge, Massachusetts, 02142, United States;

22 <sup>⊥</sup>National Nanotechnology Center, Klong Nueng, 12120, Thailand

23

24 \* Address correspondence to

25 Dr. Ruibin Li                      Email: [liruibin@suda.edu.cn](mailto:liruibin@suda.edu.cn)

26 Dr. Zhaoxia Ji                      Email: [zji@cnsi.ucla.edu](mailto:zji@cnsi.ucla.edu)

27

28

29

30 **Abstract**

31 Increasingly raised concerns (nanotoxicity, clinical translation, *etc*) on  
32 nanotechnology require breakthroughs in structure-activity relationship (SAR)  
33 analyses of engineered nanomaterials (ENMs) at nano-bio interfaces. However,  
34 current nano-SAR assessments failed to disclosure sufficient information to  
35 understand ENM-induced bio-effects. Here we developed a multi-hierarchical  
36 nano-SAR assessment for a representative ENM, Fe<sub>2</sub>O<sub>3</sub> by systematically examining  
37 cellular metabolite and protein changes. This nano-SAR profile allows visualizing the  
38 contributions of 7 basal properties of Fe<sub>2</sub>O<sub>3</sub> to their diverse bio-effects. For instance,  
39 while surface reactivity is responsible for Fe<sub>2</sub>O<sub>3</sub>-induced cell migration, the  
40 inflammatory effects of Fe<sub>2</sub>O<sub>3</sub> nanorods and nanoplates are determined by their aspect  
41 ratio and surface reactivity, respectively. We further discovered the detailed  
42 mechanisms, including NLRP3 inflammasome pathway and monocyte  
43 chemoattractant protein-1 involved signaling. Both effects were further validated in  
44 animal lungs. Our findings provide substantial new insights at nano-bio interfaces,  
45 which may facilitate the tailored design of ENMs to endow them with desired  
46 bio-effects.

47

48

49

50

51

52

53

54

55

56

57

58

59

60

61 The physicochemical properties of engineered nanomaterials (ENMs) have been  
62 demonstrated to play a decisive role in nano-bio interactions<sup>1</sup>. Given the rapidly  
63 increasing number of ENMs as well as their diverse physicochemical properties  
64 including size, shape, surface area, surface reactivity, mechanical strength, *etc.*<sup>2</sup>, the *in*  
65 *vitro* structure-activity relationship (SAR) studies on ENMs have significantly  
66 promoted the development of nanobiotechnology<sup>3-5</sup>. In general, nano-SAR analyses  
67 have enabled the determination of the key physicochemical properties of ENMs that  
68 are responsible for evoking a target bio-effect in the organism<sup>1,6</sup>, allowed bio-hazard  
69 ranking of various new ENMs<sup>7</sup>, and facilitated the engineering design of  
70 biocompatible materials by tailored functionalization<sup>8</sup>. However, current nano-SAR  
71 analyses only focus on the influence of a single property (size, charge, or surface  
72 charge, *etc.*) of ENMs to individual bio-effects (*e.g.* apoptosis, necrosis, autophagy or  
73 inflammation, *etc.*)<sup>2</sup>. Considering some increasingly raised bottleneck problems in  
74 nanotechnology, *e.g.* various ENM-induced nanotoxicities<sup>3,4</sup>, and severe clinical  
75 translation barriers in nanomedicine<sup>10</sup>, there is a demand for tiered views of  
76 nano-SARs.

77

78 System biology is a new theme in biological science, aiming at system-level  
79 understanding of biological organisms. Several omics-based technologies including  
80 genomics, proteomics, metabolomics, *etc.*, have been developed for systematic  
81 analysis of biomolecules (genes, proteins, metabolites, *etc.*) expressed in cells or  
82 tissues<sup>10</sup>. Recently, some progresses have been made using omics to investigate  
83 protein corona on ENM surfaces<sup>11</sup>, examine ENM-induced cell signaling changes<sup>12,13</sup>,  
84 define the routes of ENM trafficking<sup>14</sup>, decipher cytotoxicity mechanisms<sup>15</sup>, *etc.*  
85 However, so far, no attempts have been made for nano-SAR assessments<sup>16</sup>. Since  
86 proteins and metabolites are the executors or end products of signaling pathways and  
87 multi-omics analyses offer a better view of the global biological changes<sup>17</sup>, we  
88 hypothesized that multi-hierarchical nano-SAR assessments could be achieved *via*  
89 coupling of proteomics and metabolomics analyses.

90

91 In this study, we engineered a series of iron oxide nanoparticles to assess their SAR  
92 because they are widely used in constructions<sup>18</sup>, pigments<sup>19</sup>, biomedicine<sup>20, 21</sup>, *etc*, and  
93 their global production had reached to 1.83 billion in 2015. We selected Fe<sub>2</sub>O<sub>3</sub>  
94 nanorods and nanoplates here based on our previous experience that various nanorods  
95 like CeO<sub>2</sub>, AlOOH and lanthanide materials, or nanoplates (e.g. Ag nanoplates) were  
96 demonstrated to be more reactive than other shapes<sup>22-24</sup>. The metabolomics and  
97 proteomics changes induced by Fe<sub>2</sub>O<sub>3</sub> particles were examined in THP-1 cells, a  
98 macrophage-like cell line, which are the first port of entry for the ENMs exposed to  
99 mammalian systems<sup>7, 25</sup>. A multi-hierarchical nano-SAR profile was established by  
100 integration of the physicochemical properties of Fe<sub>2</sub>O<sub>3</sub> particles, biological effects and  
101 their correlation coefficients. The identified nano-SARs were selectively validated by  
102 deciphering the detailed mechanisms *in vitro* and *in vivo*.

103

## 104 **Results**

### 105 **Preparation and characterization of Fe<sub>2</sub>O<sub>3</sub> nanoparticle library**

106 To explore the SAR of Fe<sub>2</sub>O<sub>3</sub>, we synthesized a series of Fe<sub>2</sub>O<sub>3</sub> NPs with different  
107 morphologies and sizes, including 4 hexagonal nanoplates (P1~P4) with controlled  
108 diameters and thicknesses, and 4 nanorods (R1~R4) with systematically tuned lengths  
109 and diameters. Transmission electron microscopy (TEM) was used to determine the  
110 size and morphology of all Fe<sub>2</sub>O<sub>3</sub> particles. Figure 1A shows that the diameters of  
111 Fe<sub>2</sub>O<sub>3</sub> nanoplates range from 45 to 173 nm and their thicknesses are 16~44 nm, while  
112 the lengths and diameters of nanorods are 88~320 and 20~53 nm, respectively. We  
113 further calculated the ratios of diameter to thickness for the nanoplates, length to  
114 diameter for nanorods, respectively, and denoted them as aspect ratios (ARs). The  
115 ARs of Fe<sub>2</sub>O<sub>3</sub> nanoplates and nanorods are 1.0~10.8 and 1.7~8.0, respectively. The  
116 surface areas were 16~27 m<sup>2</sup>/g, determined by Brunauer-Egmmett-Teller (BET)  
117 method (Table 1).

118

119 X-ray diffraction analysis (XRD) was performed to determine the crystal structure of

120 Fe<sub>2</sub>O<sub>3</sub>. Figure S1 shows the XRD patterns for selected nanoplates and nanorods, P2  
121 and R2. All diffraction peaks could be indexed to rhombohedral  $\alpha$ -Fe<sub>2</sub>O<sub>3</sub> phase  
122 (JCPDS no. 33-0664) and no other impurity peaks were detected.

123 A

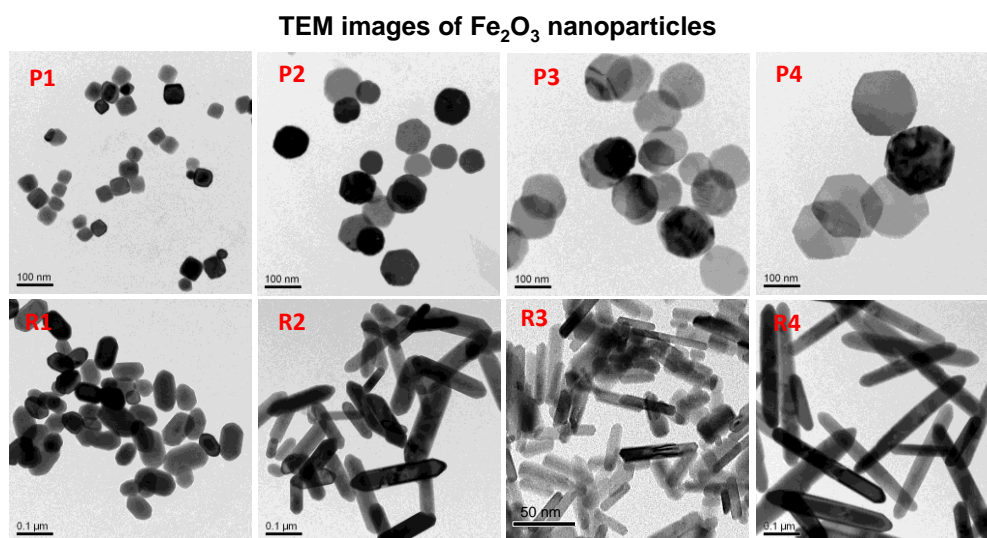

124  
125

B

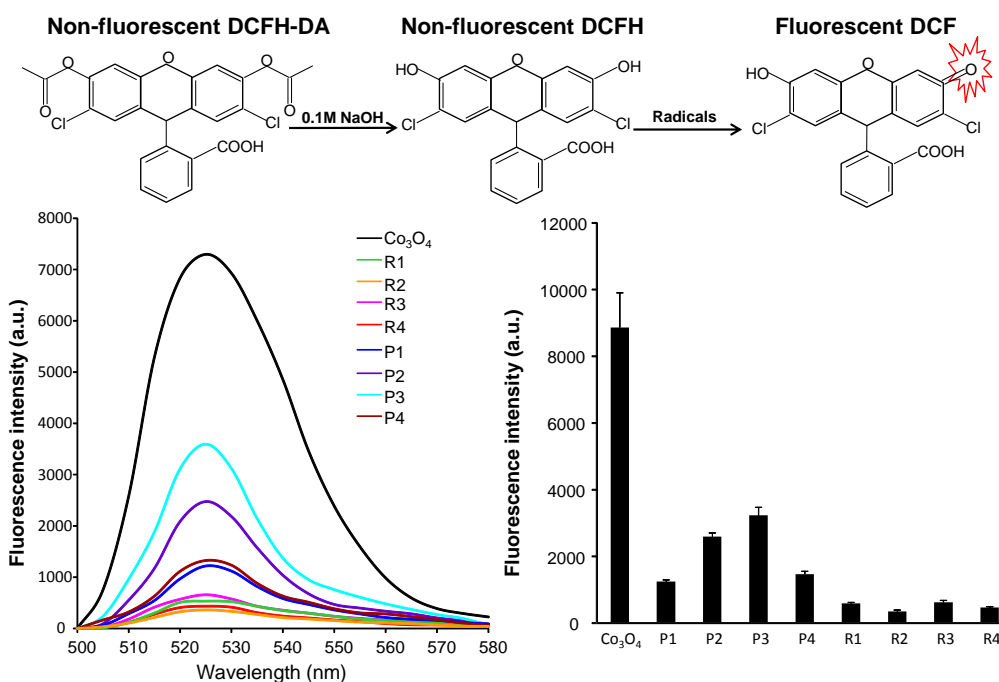

126  
127

### Figure 1 Characterization of Fe<sub>2</sub>O<sub>3</sub> nanoparticles by TEM and DCF assay

129 A) TEM images and B) surface reactivity of Fe<sub>2</sub>O<sub>3</sub> nanoparticles. TEM samples were prepared by  
130 placing a drop of the particle suspensions (50 μg/mL in DI H<sub>2</sub>O) on the grids. To assess the  
131 surface reactivity of Fe<sub>2</sub>O<sub>3</sub> samples, 95 μL aliquots of 25 ng/mL DCF were added into each well  
132 of a 96-multiwell black-bottom plate and mixed with 5 μL of nanoparticle suspensions at 5  
133 mg/mL, followed by 2 h incubation. A SpectraMax M5 microplate reader was used to record the  
134 fluorescence emission spectra of DCF agent at an excitation wavelength of 490 nm.

135

136 The hydrodynamic sizes in RPMI medium were assessed by dynamic light scattering  
 137 (DLS), showing ranges from 170 to 380 nm for plates and 420-540 nm for rods (Table  
 138 1). The surface charges of Fe<sub>2</sub>O<sub>3</sub> particles were determined by a Zeta potential  
 139 analyzer (ZPA), and showed very similar Zeta potential values of 0 to -10 mV in cell  
 140 culture media, which reflects the formation of protein corona on particle surface.

141

**Table 1 Quantitative Characterization of Fe<sub>2</sub>O<sub>3</sub> nanoparticles**

| Properties                       | Detection methods | Quantitative Characterization |             |             |             |             |             |             |             |
|----------------------------------|-------------------|-------------------------------|-------------|-------------|-------------|-------------|-------------|-------------|-------------|
|                                  |                   | Plates                        |             |             |             | Rods        |             |             |             |
|                                  |                   | P1                            | P2          | P3          | P4          | R1          | R2          | R3          | R4          |
| Length (nm)                      | TEM               | NA                            | NA          | NA          | NA          | 88 ± 8      | 181 ± 11    | 116 ± 12    | 322 ± 26    |
| Diameter (nm)                    | TEM               | 45 ± 3                        | 84 ± 5      | 122 ± 7     | 173 ± 6     | NA          | NA          | NA          | NA          |
| Thickness (nm)                   | TEM               | 44 ± 7                        | 23 ± 3      | 18 ± 2      | 16 ± 3      | 53 ± 8      | 38 ± 5      | 20 ± 4      | 40 ± 7      |
| Aspect ratio                     | Cal.*             | 1.0 ± 0.1                     | 3.7 ± 0.2   | 6.8 ± 0.1   | 10.8 ± 0.3  | 1.7 ± 0.2   | 4.5 ± 0.4   | 5.8 ± 0.5   | 8.0 ± 0.7   |
| Hydrodynamic size (nm)           | DLS               | 175 ± 10                      | 246 ± 7     | 366 ± 16    | 378 ± 8     | 422 ± 12    | 463 ± 8     | 578 ± 8     | 536 ± 4     |
| Zeta potential (mV)              | ZPA               | -7.9 ± 0.8                    | -3.6 ± 0.6  | -5.1 ± 0.4  | -3.7 ± 0.7  | -6.5 ± 0.7  | -10.7 ± 1.6 | -8.5 ± 0.6  | -5.2 ± 2.1  |
| Surface area (m <sup>2</sup> /g) | BET               | 22 ± 1.6                      | 17.9 ± 1.0  | 17.4 ± 0.6  | 16.8 ± 0.4  | 18.3 ± 1.5  | 20.8 ± 1.8  | 26.9 ± 2.3  | 21.3 ± 1.8  |
| Surface activity (a.u.)          | DCF               | 1.25 ± 0.08                   | 2.59 ± 0.11 | 3.23 ± 0.15 | 1.46 ± 0.08 | 0.59 ± 0.04 | 0.35 ± 0.03 | 0.63 ± 0.07 | 0.47 ± 0.03 |

142 \*Calculation (Cal.): Aspect ratio =  $\frac{\text{Length (or Diameter)}}{\text{Thickness}}$

143

144 We used the 2',7'-dichlorofluorescein (DCF) assay to investigate the surface reactivity  
 145 of Fe<sub>2</sub>O<sub>3</sub> nanoparticles. The DCF assay is based on a mechanism that nonfluorescent  
 146 2',7'-dichlorodihydrofluorescein (H<sub>2</sub>DCF) could be converted to the highly fluorescent  
 147 DCF by oxidation. This assay has been widely used to access the radicals or abiotic  
 148 reactive oxygen species (ROS) generation on nanoparticle surface<sup>6, 8</sup>. Co<sub>3</sub>O<sub>4</sub>  
 149 nanoparticles have been demonstrated to exhibit high surface reactivity in DCF assay  
 150 and were used as a positive control<sup>26</sup>. As shown in Figure 1B, Fe<sub>2</sub>O<sub>3</sub> nanoplates are  
 151 more reactive than nanorods, and P3 exhibits the highest surface oxidative capability.  
 152 These differences in surface reactivity may result from their crystal facets. XRD  
 153 analysis shows that (104) is the dominant facet in Fe<sub>2</sub>O<sub>3</sub> nanoplates as compared to  
 154 (110) as the strongest peak for the nanorods (Figure S1). This is consistent with  
 155 several earlier studies showing that (104) as the dominant facet of the α-Fe<sub>2</sub>O<sub>3</sub>

156 nanoplates is highly catalytically active<sup>27</sup>. Therefore, the high surface reactivity of  
157 nanoplates observed here can be attributed to the exposure of more active (104)  
158 facets.

159

### 160 **Using metabolomics to explore Fe<sub>2</sub>O<sub>3</sub> induced metabolite changes**

161 Metabolites are the end products of diverse intracellular processes, so the changes of  
162 cell metabolome can reflect cell responses to stimuli. We performed a global  
163 metabolomics study to explore the metabolic changes induced by Fe<sub>2</sub>O<sub>3</sub> nanoparticles  
164 in THP-1 cells, a myeloid cell line that is often used as an *in vitro* model for studying  
165 the effects of engineered nanoparticles on immune cells<sup>28</sup>. As described in the  
166 experimental section, the metabolites in THP-1 cells after Fe<sub>2</sub>O<sub>3</sub> treatment were  
167 extracted and subjected to C18 reversed-phase column for nontargeted liquid  
168 chromatography-mass spectrometry (LC-MS) analysis on a high-resolution Triple  
169 Time of Flight (TOF) mass spectrometry in both positive (ESI+) and negative (ESI-)  
170 ionization modes. By use of XCMS software, 8001 and 3479 metabolite features were  
171 obtained from the LC-MS data collected in ESI+ and ESI- mode, respectively.  
172 One-way analysis of variance (ANOVA) was used to screen metabolite differences  
173 associated with Fe<sub>2</sub>O<sub>3</sub> treatment. The significance of each feature was determined by  
174 its p-value and false discovery rate (FDR) truncated at 0.01 and 0.05, respectively. As  
175 a result, 1674 and 1180 discriminating features were detected in the data of ESI+ and  
176 ESI- mode, respectively. Figure 2A shows a heat map of the significant features.  
177 Compared to the control, Fe<sub>2</sub>O<sub>3</sub>-treated samples show increases in most of the  
178 detected features. R4 induces the most significant metabolic changes in THP-1 cells,  
179 R1, R2, R3 and P3 show moderate effects, while P1, P2 and P4 are relatively  
180 bio-inert.

181

182 We further performed a hierarchical clustering analysis of metabolites to calculate the  
183 Euclidean distances (EDs) between control sample and nanoparticle-treated samples<sup>29</sup>.  
184 This parameter was used to quantitatively describe the global metabolite profile  
185 changes by Fe<sub>2</sub>O<sub>3</sub>, and a longer distance usually means more disruptions to the

186 homeostasis of cellular metabolism, which could be considered as a bio-activity index  
187 of stimuli at systemic levels<sup>30</sup>. As shown in Figure 2A, the ED ranking of different  
188 Fe<sub>2</sub>O<sub>3</sub> particles is R4> R3> R2> P3> R1> P2> P1> P4, which is consistent with the  
189 observation on metabolite heat map. Linear regression analysis was used to  
190 investigate the relationships between EDs and the physical chemical properties of  
191 Fe<sub>2</sub>O<sub>3</sub> nanoparticles (Figure S2). According to the r<sup>2</sup> values of regression models,  
192 surface reactivity and aspect ratio are the dominant physicochemical properties for the  
193 global metabolite changes in THP-1 cells, and account for 88.98% and 98.02% of ED  
194 variations in nanoplates and nanorods, respectively.

195 **A**

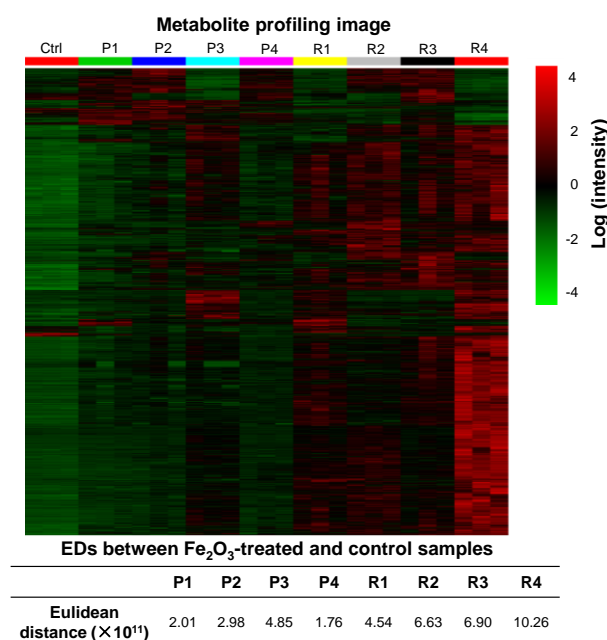

196

197 **B**



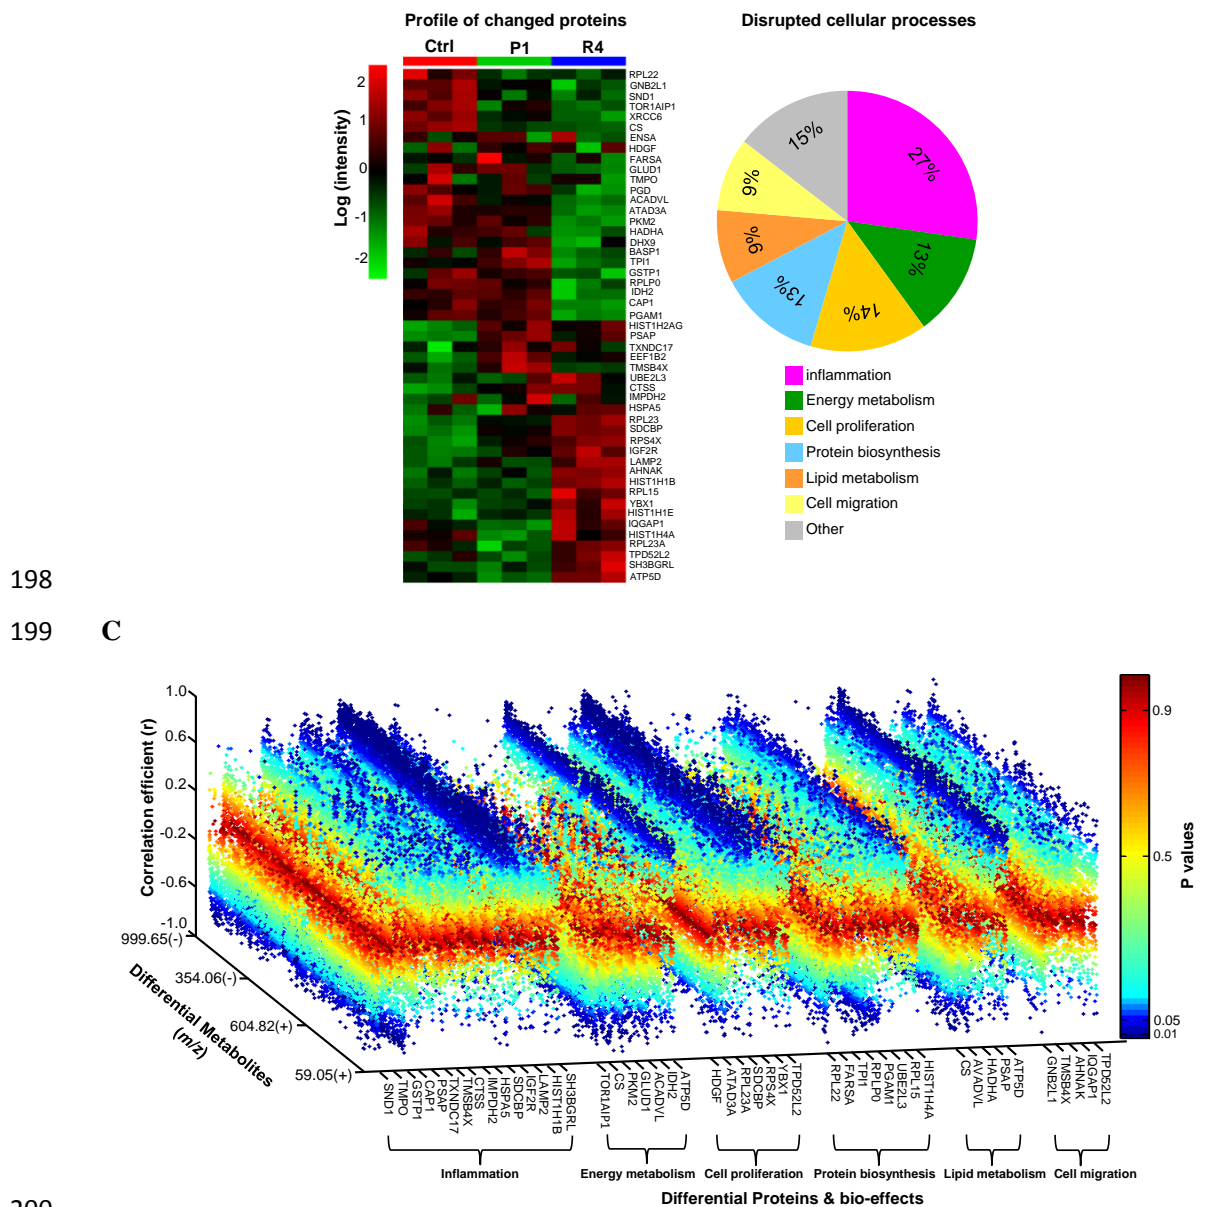

200

201 **Figure 2 Fe<sub>2</sub>O<sub>3</sub> induced metabolomics and proteomics changes and their relationships**

202 **A)** Metabolite profile of THP-1 cells exposed to Fe<sub>2</sub>O<sub>3</sub> library as well as their Euclidean distances  
 203 (EDs). After 24 h treatment, the cell samples (n= 3 independent experiments) were collected to  
 204 extract proteins and metabolites. For metabolomics analysis, the log-transformed normalized peak  
 205 intensities of metabolites in all the cell samples were expressed using red, black or green colors in  
 206 a heat map. EDs between control and nanoparticle-treated samples were calculated to  
 207 quantitatively evaluate the global metabolite profile changes induced by Fe<sub>2</sub>O<sub>3</sub>. **B)** Fe<sub>2</sub>O<sub>3</sub>  
 208 nanoparticle induced protein expression changes and bio-effects. For proteomics analysis, a heat  
 209 map was plotted in a similar way as metabolites, showing 49 significantly changed proteins in  
 210 proteomics analysis (left panel). The pathways or bio-effects related with these proteins were  
 211 determined by KEGG and UniprotKB database (right panel). The percentages of the differential  
 212 proteins involved in each specific bio-effects of Fe<sub>2</sub>O<sub>3</sub> were shown in the pie chart. **C)** Regression  
 213 analysis between differential proteins and metabolites. The regression analysis of the differential  
 214 proteins and metabolites was performed in Matlab R2009b. The correlation is considered as

215 statistically significant with correlation coefficient ( $r \leq -0.8$  or  $r \geq 0.8$ , and  $p \leq 0.01$ ).

216

### 217 **Discovery of the bio-effects of Fe<sub>2</sub>O<sub>3</sub> particles by proteomics**

218 Proteins, as a major executor of signaling pathways in biological organisms are  
219 involved in many cellular effects. The bio-effects of Fe<sub>2</sub>O<sub>3</sub> nanoparticles in cells could  
220 be determined by identification of the proteome changes. Since the metabolomics  
221 profile suggests that R4 and P1 are the most bio-active and bio-inert materials,  
222 respectively, they were selected and exposed to THP-1 cells for proteomics analysis.  
223 The protein expression was analyzed by a nanoscale liquid chromatography coupled  
224 to tandem mass spectrometry (nano LC-MS/MS) as described in the experimental  
225 section, and 785 proteins were identified for statistical analysis.

226

227 To discover the biomarkers related to the bio-effects of Fe<sub>2</sub>O<sub>3</sub>, ANOVA analysis was  
228 performed. As a result, 49 identified proteins with  $p$  values  $< 0.01$  and FDRs  $< 0.05$   
229 were considered to be significantly changed after Fe<sub>2</sub>O<sub>3</sub> treatment. The data were  
230 further integrated into a heat map to visualize the expression levels of these proteins  
231 in control, P1 and R4 samples (Figure 2B). While R4 induced significant proteome  
232 changes in THP-1 cells including 25 up-regulated and 24 down-regulated proteins, P1  
233 had negligible effects. We used KEGG and UniprotKB database to investigate the  
234 impacts of the 49 proteins to cell pathways and functions. These proteins were found  
235 to mainly participate in 6 biological processes, including inflammation, cell  
236 proliferation, energy metabolism, lipid metabolism, protein biosynthesis and cell  
237 migration (Figure 2B). Regression analysis was used to explore the relationships  
238 between the changed proteins and the metabolites. As shown in Figure 2C,  
239 correlations between the bio-effects and metabolite changes could be plotted  
240 successfully, which provides an opportunity to explore the relationships between the  
241 physicochemical properties of Fe<sub>2</sub>O<sub>3</sub> nanoparticles and their bio-effects.

242

### 243 **Profiling the multi-hierarchical nano-SAR of Fe<sub>2</sub>O<sub>3</sub> nanoparticles by a 3D** 244 **heatmap**

245 A 3D heatmap was plotted to quantitatively describe the influences of  
246 physicochemical properties to the bio-effects of Fe<sub>2</sub>O<sub>3</sub> nanoparticles by regression  
247 analysis among the properties of nanoparticles, their metabolite changes and  
248 bio-effects (Figure 3). While the zeta potential of Fe<sub>2</sub>O<sub>3</sub> nanoplates has some effects  
249 on cell proliferations with coefficient  $r^2$  value at 0.64, surface reactivity is the  
250 dominant property that impacts other 5 bio-effects as well as global cellular changes.  
251 For Fe<sub>2</sub>O<sub>3</sub> nanorods, surface reactivity is responsible for the disruption of cell  
252 migration ( $r^2=0.88$ ) and protein biosynthesis ( $r^2=0.99$ ); particle length significantly  
253 affects the energy and lipid metabolism processes; AR plays a major role in  
254 inflammation and cell proliferation. These results suggest that there is one dominant  
255 property that best correlates with a specific bio-effect. This is the first time that we  
256 determined the contributions of 7 basal physicochemical properties of ENMs to their  
257 diverse bio-effects by plotting a nano-SAR profile at multi-hierarchical levels.

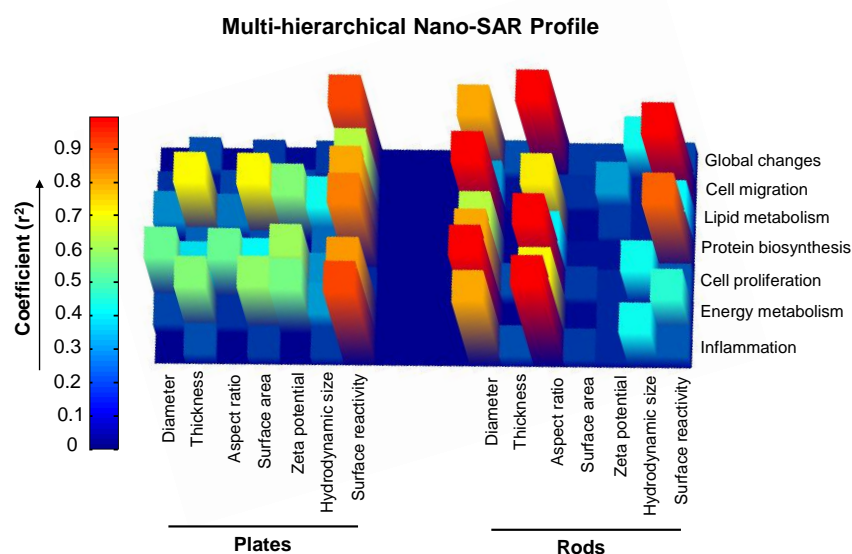

258

### 259 **Figure 3 Multi-hierarchical profiling the nano-SAR of Fe<sub>2</sub>O<sub>3</sub> particles**

260 The relationships between the 7 physicochemical properties of Fe<sub>2</sub>O<sub>3</sub> nanoparticles and their  
261 bio-effects could be visualized by the 3D heatmap, which is established by regression analyses  
262 among metabolites, differential proteins and Fe<sub>2</sub>O<sub>3</sub> properties.

263

### 264 **Exploring the inflammatory effects of Fe<sub>2</sub>O<sub>3</sub> nanoparticles in THP-1 cells by** 265 **deciphering the detailed mechanism**

266 The nano-SAR profile indicates that Fe<sub>2</sub>O<sub>3</sub> nanoparticles may induce significant

267 inflammatory effects in THP-1 cells. Among the changed proteins, 15 of them are  
268 involved in inflammation pathways, *e.g.*, proactivator polypeptide (PSAP), cathepsin  
269 S (CTSS), and cation-independent mannose-6-phosphate receptor (IGF2R). These  
270 proteins have effects on phagocytosis and lysosomal dysfunction<sup>31-33</sup>, implying a  
271 lysosome-involved mechanism. We further investigated this by detecting the  
272 pro-inflammatory cytokine release in THP-1 cells. Monosodium urate (MSU) was  
273 used as a positive control to evoke inflammatory response. Although Fe<sub>2</sub>O<sub>3</sub>  
274 nanoparticles have little effect on cytokine production in THP-1 cells exposed to  
275 0-100 µg/mL particles for 24 h (Figure S3A), all Fe<sub>2</sub>O<sub>3</sub>-treated cells exhibit  
276 significant IL-1β and TNF-α increase in dose-dependent manners at 48 h (Figure 4A  
277 and S3B). However, all these particles show little effects in cell viability (Figure S4).  
278 At the 100 µg/mL exposure dose, R4 exhibits the highest inflammatory cytokine  
279 production, P3, R2 and R3 have moderate effects, while P1, P2, P4 and R1 induce a  
280 small amount of cytokine release. This trend can't be explained by the cellular uptake  
281 levels of Fe<sub>2</sub>O<sub>3</sub> nanoparticles. Although the nanorods in general have relatively higher  
282 cellular uptake than the nanoplates, there's no difference among nanorods (or  
283 nanoplates) (Figure S5). Consistent with the nano-SAR profile, cytokine productions  
284 by rods and plates have good correlation with their aspect ratios and surface reactivity,  
285 respectively.

286 A

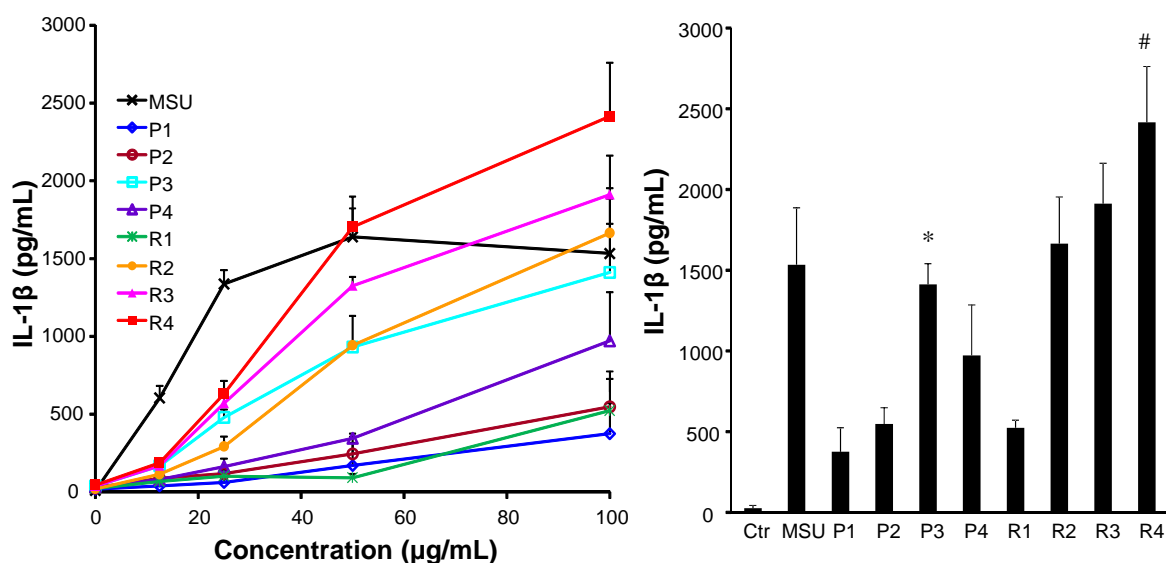

287

288 B

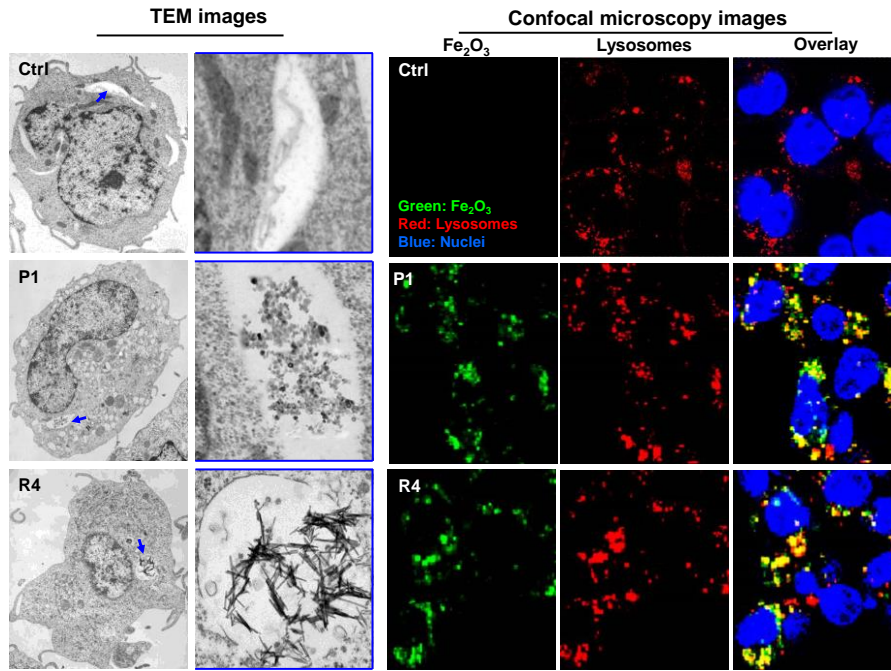

289

290 **C**

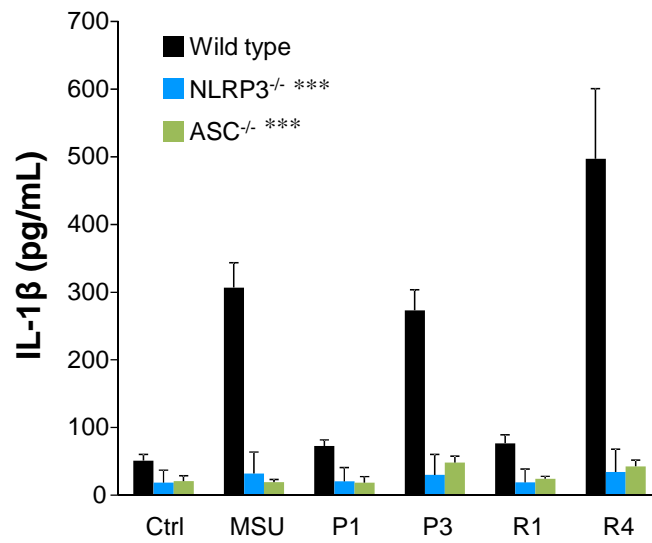

291

292 **D**

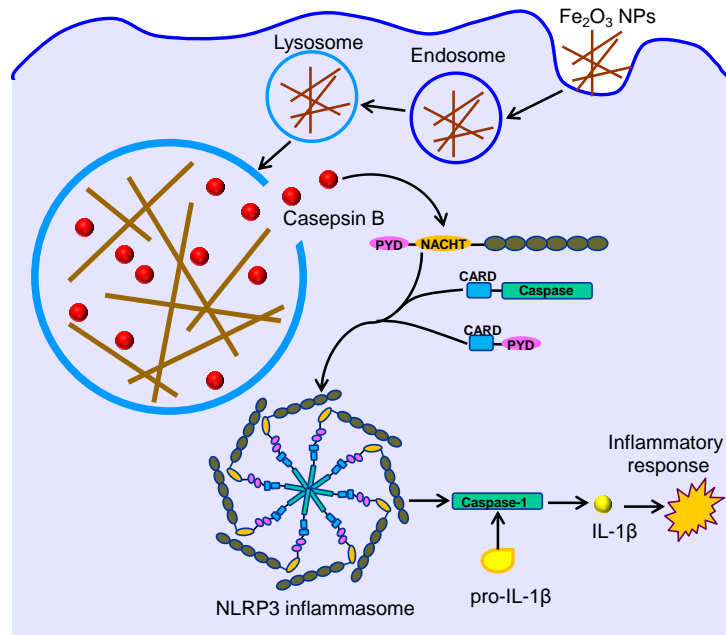

293

294 **Figure 4 Determination of the inflammatory pathway of Fe<sub>2</sub>O<sub>3</sub> in THP-1 cells**

295 **A)** IL-1β production in THP-1 cells exposed to 0-100 μg/mL Fe<sub>2</sub>O<sub>3</sub> nanoparticles for 48 h. \*p<  
296 0.05 compared to P1, P2 and P4, #p< 0.05 compared to other particles (two-tailed Student's t-test).  
297 After 48 h incubation of THP-1 cells with Fe<sub>2</sub>O<sub>3</sub> particles, the supernatants were collected to  
298 quantify cytokine productions by ELISA. **B)** TEM and confocal microscopy imaging of  
299 internalized Fe<sub>2</sub>O<sub>3</sub> nanoparticles. THP-1 cells exposed to pristine or FITC-labeled Fe<sub>2</sub>O<sub>3</sub>  
300 nanoparticles were washed, fixed and stained for TEM or confocal microscopy imaging. Hoechst  
301 33342 dye (blue) and Alexa fluor 594 labeled antibodies (red) were used to identify nuclei and  
302 lysosomes, respectively. **C)** comparison of IL-1β production in Wild-type, NALP3<sup>-/-</sup>, and ASC<sup>-/-</sup>  
303 THP-1 cells exposed to Fe<sub>2</sub>O<sub>3</sub> nanoparticles, \*\*\*p< 0.001 compared to particle-treated Wild-type  
304 cells (two-tailed Student's t-test). Data in the line and bar graphs are shown as mean ± s.d. from 4  
305 independent replicates. **D)** schematic to explain the inflammatory mechanism.

306

307 In order to understand the detailed mechanisms involved in Fe<sub>2</sub>O<sub>3</sub>-induced  
308 inflammatory effect, we further treated THP-1 cells with cytochalasin D, a  
309 cytoskeletal inhibitor of endocytosis, before exposure to the Fe<sub>2</sub>O<sub>3</sub> particles. All cells  
310 treated with cytochalasin D showed a decrease in IL-1β release, suggesting that  
311 cellular uptake is essential in generating the inflammatory effect (Figure S6).  
312 Confocal microscopy was used to study the cellular uptake of fluorescein  
313 isothiocyanate (FITC)-labeled Fe<sub>2</sub>O<sub>3</sub> nanoparticles, and we found that most of the  
314 labeled nanoparticles co-localized with an Alexa fluor 594-labeled LAMP1-positive  
315 compartment with co-localization coefficients ranging from 73-93% by Image J  
316 analysis (Figure 4B). This suggests that Fe<sub>2</sub>O<sub>3</sub> nanoparticles were mainly taken into



317 the lysosomes of THP-1 cells. TEM data confirmed that Fe<sub>2</sub>O<sub>3</sub> nanoparticles are  
318 encapsulated into vesicular THP-1 compartments of THP-1 cells. Since lysosome is  
319 an acidifying environment, Fe<sub>2</sub>O<sub>3</sub> particles tend to aggregate in this intracellular  
320 compartment and interact with its membranes. This likely has led to the lysosome  
321 membrane damage due to the reactive surface (nanoplates) or geometric shape of  
322 Fe<sub>2</sub>O<sub>3</sub> nanorods.

323

324 In order to understand the biological impact of Fe<sub>2</sub>O<sub>3</sub> nanoparticles in lysosomal  
325 compartments, we asked whether that would impact lysosomal function. Confocal  
326 microscopy was used to study the subcellular localization of cathepsin B, a lysosomal  
327 enzyme capable of cleaving a Magic Red<sup>TM</sup>-labeled substrate. As shown in Figure  
328 S7A, untreated cells show a punctate distribution of Magic Red<sup>TM</sup>, indicating that the  
329 enzyme is contained in intact lysosomes. However, after lysosomal damage by MSU,  
330 there is a diffuse cytosolic release of the fluorescence marker. Similarly, P3 and R4  
331 nanoparticles induce cathepsin B release, while P1 and R1 nanoparticles are not  
332 associated with lysosomal damage. Since cathepsin B is known to contribute to the  
333 activation of the NLRP3 inflammasome and IL-1 $\beta$  production<sup>34</sup>, this may explain the  
334 severe inflammatory cytokine release in Fe<sub>2</sub>O<sub>3</sub>-treated THP-1 cells. The role of  
335 cathepsin B in NLRP3 inflammasome activation was further confirmed by using a  
336 cathepsin B inhibitor, CA-074-Me, which shows the inhibitory effect in IL-1 $\beta$   
337 production (Figure S7B). Moreover, we confirmed that active assembly of the NLRP3  
338 inflammasome subunits is required for IL-1 $\beta$  production by using NLRP3- and ASC-  
339 gene knockdowns to show the interference in cytokine release in THP-1 cells (Figure  
340 4C).

341

342 Based on the mechanism study, we for the first time deciphered the inflammatory  
343 pathway of Fe<sub>2</sub>O<sub>3</sub> in THP-1 cells. As shown in Figure 4D, Fe<sub>2</sub>O<sub>3</sub> nanoparticles are  
344 internalized into lysosomes through endocytosis. Macrophage uptake and lysosomal  
345 processing of Fe<sub>2</sub>O<sub>3</sub> nanoparticles further lead to the interaction with lysosome  
346 membrane. Because of the surface reactivity and geometric shape of Fe<sub>2</sub>O<sub>3</sub> nanoplates

347 and nanorods, these particles may induce lysosome damage, cathepsin B release into  
348 cytoplasm, recruitment of NLRP3, pro-caspase 1 and ASC subunits, NLRP3  
349 inflammasome activation and IL-1 $\beta$  release from the macrophages. IL-1 $\beta$  may further  
350 participate in a progressive march of inflammation events in organs.

351

### 352 **Examining the effects of Fe<sub>2</sub>O<sub>3</sub> nanoparticles in cell migration**

353 The nano-SAR profile also indicates that surface reactivity may be responsible for  
354 Fe<sub>2</sub>O<sub>3</sub>-induced cell migration. Since monocyte chemoattractant protein-1 (MCP-1 or  
355 CC-chemokine ligand 2) is widely reported to be a critical factor for mediating arrest  
356 of the monocytic cells and directional migration<sup>35</sup>, we first examined the effects of  
357 Fe<sub>2</sub>O<sub>3</sub> particles on MCP-1 production. After 24 h exposure to Fe<sub>2</sub>O<sub>3</sub> nanoparticles,  
358 significant MCP-1 production was detected in the supernatants of THP-1 cells, and  
359 Fe<sub>2</sub>O<sub>3</sub> plates show higher MCP-1 production than rods (Figure 5A). While P3  
360 stimulates the highest MCP-1 secretion in THP-1 cells, P2 and P4 had moderate  
361 effects. Bindarit, as an inhibitor of MCP-1 pathway, could effectively block all Fe<sub>2</sub>O<sub>3</sub>  
362 induced MCP-1 productions. Then we transferred the supernatants of Fe<sub>2</sub>O<sub>3</sub>-treated  
363 THP-1 cells to the lower chambers of transwell systems to examine the effects in cell  
364 migration. As shown in Figure 5B, Fe<sub>2</sub>O<sub>3</sub> plates with high surface reactivity induce  
365 significant cell migration, and P3 shows the highest level. To investigate whether the  
366 macrophage recruitment is a result of MCP-1 production, we examined the effects of  
367 supernatants from THP-1 cells exposed to bindarit and Fe<sub>2</sub>O<sub>3</sub> particles on cell  
368 migration. Bindarit treatment results in total reduction of cell migration. These results  
369 indicate that Fe<sub>2</sub>O<sub>3</sub> plates could induce MCP-1 dependent cell migration, and surface  
370 reactivity is the dominant property for this effect. Immune cell recruitment is an early  
371 statement in acute immune responses and involves transendothelial migration toward  
372 the stimulation site to protect health tissues<sup>36</sup>. Thus, with regard to monocyte or  
373 leukocyte migration, Fe<sub>2</sub>O<sub>3</sub> nanoplates display immunostimulatory functions and may  
374 serve as a modulator to activate immune cell recruitment.

375 **A**

**B**



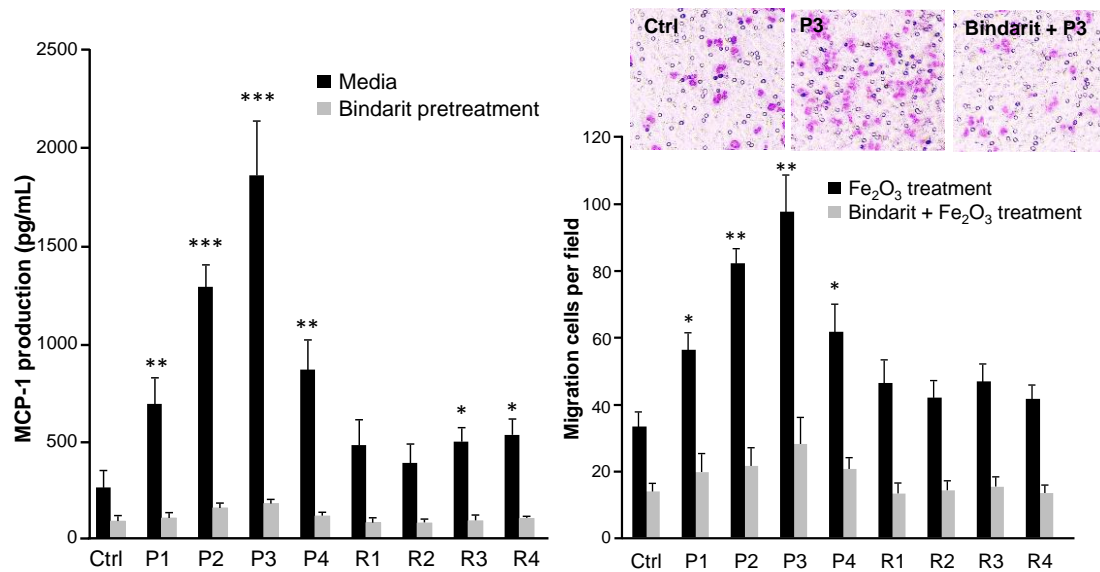

376

### 377 **Figure 5 Effects of Fe<sub>2</sub>O<sub>3</sub> nanoparticles on THP-1 cell migration**

378 **A)** MCP-1 production in the supernatants of Fe<sub>2</sub>O<sub>3</sub>-treated cells, and **B)** transwell migration assays  
379 of THP-1 cells. THP-1 cells were pretreated with or without 100 μM bindarit for 3 h before  
380 exposure to 100 μg/mL Fe<sub>2</sub>O<sub>3</sub> nanoparticles. After 24 h incubation, the supernatants of treated  
381 THP-1 cells were collected and divided into 2 portions. One was used for MCP-1 measurement by  
382 ELISA, and the other one was added into the lower chambers of transwell systems to incubate  
383 with THP-1 cells in upper chamber for 24 h. The migration cells were stained with Diff Quick  
384 agent and counted under microscope (n=5 images for each treatment). \*p< 0.05, \*\*p< 0.01, \*\*\*p<  
385 0.001 compared to ctrl (two-tailed Student's t-test).

386

### 387 **Validation of the inflammatory effects of Fe<sub>2</sub>O<sub>3</sub> nanoparticles in mouse lungs**

388 In order to further testify the nano-SAR of cellular inflammatory effects induced by  
389 Fe<sub>2</sub>O<sub>3</sub> particles, we used an acute lung injury model to study the effect of  
390 oropharyngeal instilled nanoparticles in the whole lung. This study was performed  
391 with a particle dose of 2 mg/kg, which has been previously demonstrated to fall on the  
392 linear part of the dose-response curve for pulmonary exposure to metal oxide  
393 nanoparticles<sup>26, 37</sup>. After 40 h exposure, the animals were sacrificed to collect  
394 bronchoalveolar lavage fluid (BALF) and lung tissues. The cytokine release in BALF  
395 was determined by ELISA. As shown in Figure 6A, most of the immune cells induced  
396 by Fe<sub>2</sub>O<sub>3</sub> are neutrophils, which are dramatically boosted in P3 and R4 treated animal  
397 lungs. In addition, P3 and R4 induced significant cytokine release including IL-1β,  
398 TNF-α and LIX (Figure 6B), which is consistent with their *in vitro* inflammatory  
399 responses. The migration effect of Fe<sub>2</sub>O<sub>3</sub> particles was also validated by the MCP-1  
400 production in BALF as well as H&E staining of lung tissues. As shown in Figure 6C,

401 while P3 significantly elevates MCP-1 production and induces massive immune cell  
402 recruitment, P1 and R1 have a little effect. Interestingly, R4 exhibits limited effect in  
403 MCP-1 production but substantial immune cell recruitment in animal lungs,  
404 suggesting there may be other mechanisms involved in animal lungs. All these animal  
405 results demonstrated that the nano-SAR in Fe<sub>2</sub>O<sub>3</sub>-induced inflammatory and  
406 migration effects could be validated *in vivo*.

407 A

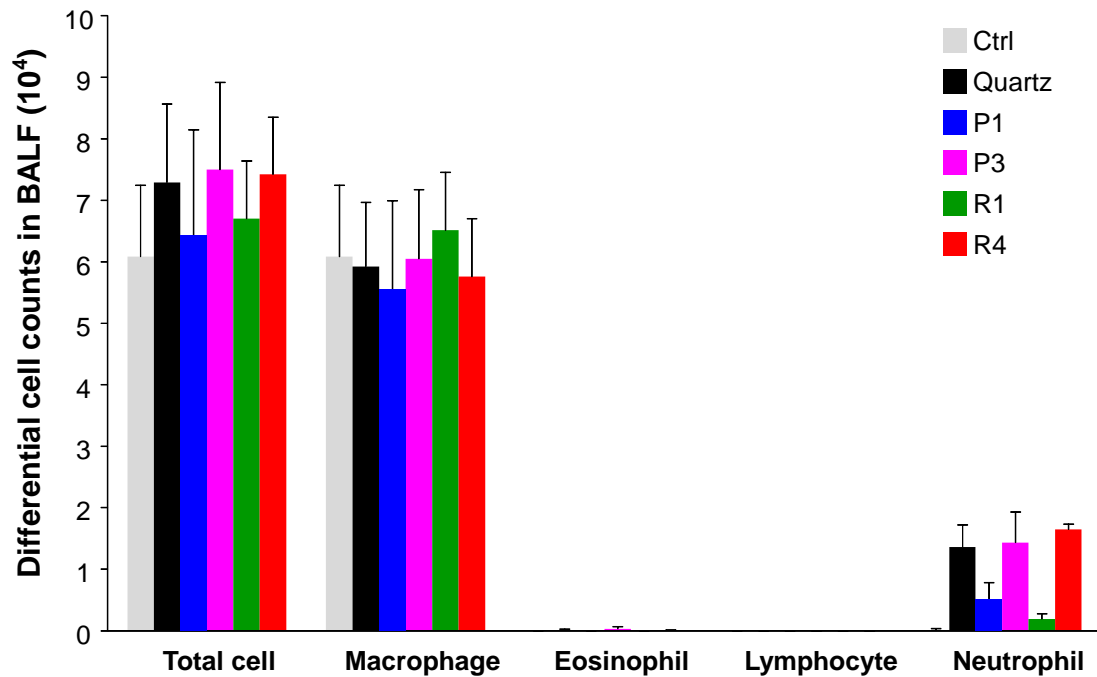

408

409

410

411

B

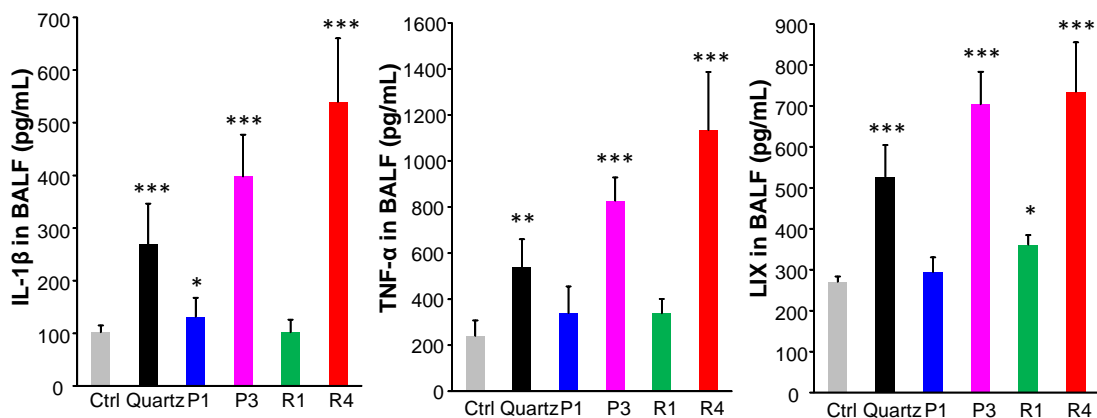

412

413

C

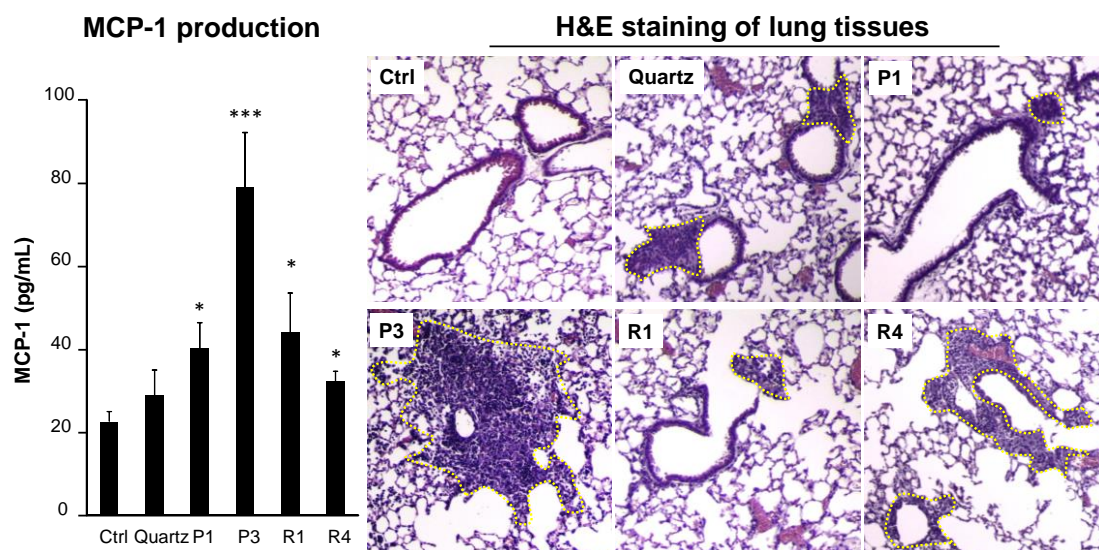

414

415 **Figure 6 Assessment of inflammatory effects and cell migration in Fe<sub>2</sub>O<sub>3</sub> treated animal**

416 **lungs**

417 **A)** Differential cell counts, **B)** cytokine release in BALF, and **C)** MCP-1 production and H&E  
418 staining of lung sections from Fe<sub>2</sub>O<sub>3</sub>-treated mice. Selected Fe<sub>2</sub>O<sub>3</sub> nanoplates (P1, P3) and  
419 nanorods (R1, R4) were oropharyngeally administrated at 2 mg/kg (n = 6 mice in each group),  
420 while animals received 5 mg/kg quartz exposure were used as positive control. After 40 h, animals  
421 were sacrificed to collect BALF for differential cell counting as well as cytokine measurement,  
422 including IL-1 $\beta$ , LIX, TNF- $\alpha$  and MCP-1. Data are shown as mean  $\pm$  s.d. from 4 independent  
423 replicates. \* p < 0.05, \*\* p < 0.01, \*\*\* p < 0.001 compared to vehicle control (two-tailed Student's  
424 t-test). The dashed lines in H&E staining images show the immune cell recruitments.

425

## 426 **Discussions**

427 In this study, we pioneered a multi-hierarchical nano-SAR assessment by  
428 simultaneously examining ENM-induced metabolite and protein changes in cells.  
429 Unlike traditional method that could only explore the nano-SAR between a specific  
430 physicochemical property of ENMs and individual bio-effects<sup>2-4</sup>, a 3D heatmap was  
431 established in this study to assess the contributions of 7 physicochemical properties of  
432 Fe<sub>2</sub>O<sub>3</sub> particles to their 6 bio-effects in cells. The nano-SAR investigation could well  
433 facilitate the identification of the key physicochemical properties that are responsible  
434 for their bio-effects because the biological responses of ENMs have been  
435 demonstrated to result from their unique physicochemical properties<sup>3,38</sup>.

436

437 Recently, Zanganeh *et al.* have demonstrated that iron oxide nanoparticle induced  
438 pro-inflammatory macrophage polarization plays an important role in tumor therapy<sup>20</sup>,

439 however, the nano-SAR information as well as the detailed inflammatory mechanism  
440 shrouds in mystery. We answered these questions by setting up a combinatorial Fe<sub>2</sub>O<sub>3</sub>  
441 library with precisely controlled size and shape as well as systematically assessment  
442 of their bio-effects. By regression analysis of particle properties, metabolite and  
443 protein changes, aspect ratio and surface reactivity were identified as the key  
444 physicochemical properties responsible for the inflammatory effects of Fe<sub>2</sub>O<sub>3</sub>  
445 nanorods and nanoplates, respectively. Fe<sub>2</sub>O<sub>3</sub>-induced cell migration is determined by  
446 surface reactivity. These findings were successfully validated in THP-1 cells and  
447 animal lungs. *In vitro* experiments further deciphered the MCP-1 dependent cell  
448 migration mechanism as well as the NLRP3 inflammatory pathway in Fe<sub>2</sub>O<sub>3</sub>-treated  
449 THP-1 cells.

450

451 Our study successfully achieved tiered view of the nano-SARs of Fe<sub>2</sub>O<sub>3</sub> particles in  
452 THP-1 cells, providing substantial new insights for tailored design of ENMs by  
453 modifying their physicochemical properties to acquire desired bio-effects. This allows  
454 us to reduce the toxicities of some hazardous ENMs<sup>7, 8, 28</sup>, or enhance the effects of  
455 nanomedicine<sup>5, 6, 39</sup>. Besides of Fe<sub>2</sub>O<sub>3</sub>, the multi-hierarchical nano-SAR assessment  
456 method could be potentially extended to other ENMs. This study has far-reaching  
457 implications for the sustainable development of nanotechnology.

458

459

## 460 **Methods**

### 461 **Materials**

462 Magic Red™ Cathepsin B Assay Kit was purchased from Immunochemistry  
463 (Bloomington, MN, USA); Hoechst 33342, H<sub>2</sub>-DCFDA, Alexa fluor 594-labeled goat  
464 anti-mouse IgG, anti-LAMP1 primary antibody were purchased from Life  
465 Technologies (Grand Island, NY, USA); ELISA kits for detection of murine or human  
466 IL-1β, TNF-α, MCP-1 and LIX were purchased from BD biosciences (San Jose, CA,  
467 USA); MTS assay kit was purchased from Promega (Madison, WI, USA); bindarit  
468 was purchased from Abcam (Cambridge, MA, USA); other chemicals unless stated

469 were purchased from Sigma-Aldrich (St. Louis, MO, USA).

470

#### 471 **In-house synthesis of Fe<sub>2</sub>O<sub>3</sub> nanoparticles**

472 Both Fe<sub>2</sub>O<sub>3</sub> nanorods and nanoplates were prepared using hydrothermal synthesis  
473 methods modified from published procedures<sup>40, 41</sup>. In a typical Fe<sub>2</sub>O<sub>3</sub> nanorod  
474 synthesis, a 10~16 mL of 0.86 M FeCl<sub>3</sub>•6H<sub>2</sub>O aqueous solution was prepared in a  
475 high density polyethylene bottle, to which 4~10 mL of 1,2-propanediamine solution  
476 was added to form a 20 mL synthesis mixture. After stirring for 15 min, the synthesis  
477 mixture was transferred to a 23 mL Teflon-lined stainless steel autoclave. The reaction  
478 was carried out in an electric oven at 180 °C under autogenous pressure and static  
479 conditions. After the reaction was complete, the autoclave was immediately cooled  
480 down in a water bath. The fresh precipitate was separated by centrifugation and  
481 washed with deionized water and ethanol alternatively for three cycles to remove  
482 ionic remnants. The final product was dried at 60 °C overnight under ambient  
483 environment. In a typical Fe<sub>2</sub>O<sub>3</sub> nanoplate synthesis, 0.4325 g of FeCl<sub>3</sub>•6H<sub>2</sub>O was  
484 dissolved in 16 mL of ethanol with a small amount of water (1.1-4.0 mL) under  
485 vigorous stirring. After FeCl<sub>3</sub>•6H<sub>2</sub>O was completely dissolved, 1.3125 g of sodium  
486 acetate was then added and the resulting mixture was mixed for another 15 mins. The  
487 reaction and final product collection were carried out the same way as those for the  
488 Fe<sub>2</sub>O<sub>3</sub> nanorods.

489

#### 490 **Preparation of Fe<sub>2</sub>O<sub>3</sub> nanoparticles suspensions in media**

491 The Fe<sub>2</sub>O<sub>3</sub> stock solutions were prepared by suspending particle powders in DI H<sub>2</sub>O  
492 (5 mg/mL) and dispersed in a bath sonicator (Branson, Danbury, CT, USA, model  
493 2510; 100 W output power; 42 kHz frequency) for 15 min. To prepare the desired  
494 concentrations of Fe<sub>2</sub>O<sub>3</sub> suspensions, an appropriate amount of each Fe<sub>2</sub>O<sub>3</sub>  
495 nanoparticle stock solution was added to cell culture media or PBS, and further  
496 dispersed using a sonication probe (Sonics & Materials, USA) at 32 W for 10 s before  
497 exposure to cultured cells or animals<sup>42</sup>.

498

## 499 **Physicochemical characterization of Fe<sub>2</sub>O<sub>3</sub> nanoparticles**

500 A particle suspension (50 µg/mL in DI H<sub>2</sub>O) drop was added on the TEM grids for  
501 air-dry at room temperature. The TEM observation was performed on a JEOL 1200  
502 EX instrument (accelerating voltage 80 kV). A Philips X'Pert Pro diffractometer  
503 equipped with CuK $\alpha$  radiation were used to obtain the XRD spectra. The  
504 hydrodynamic diameter and surface charge in water and cell culture media were  
505 measured by dynamic light scattering coupled with zeta potential analyzer  
506 (Brookhaven Instruments Corporation, Holtsville, NY, USA). DCF assay was used to  
507 evaluate the surface reactivity of Fe<sub>2</sub>O<sub>3</sub> particles. In detail, 50 µg of H<sub>2</sub>DCF-DA were  
508 mixed with 280 µL 0.01 M NaOH and incubated for 30 min at room temperature. The  
509 resulting solution was diluted with 1720 µL of a sodium phosphate buffer (25 mmol/L,  
510 pH = 7.4) to form 25 µg/mL DCF working solution. A 5 µL aliquots of nanoparticle  
511 suspension (5 mg/mL) were added into each well of a 96 multiwell black plate (Costar,  
512 Corning, NY), and then 95 µL amount of DCF working solution was added to each  
513 well, followed by 2 h incubation. DCF fluorescence emission spectra were recorded  
514 by a SpectraMax M5 microplate reader at an excitation wavelength of 490 nm<sup>8</sup>.

515

## 516 **Cell culture and treatment**

517 THP-1 cells and BEAS-2B cells were purchased from ATCC (Manassas, VA, USA),  
518 and cultured in RPMI 1640 supplemented with 10% fetal bovine serum and BEGM  
519 media, respectively. Before exposure to Fe<sub>2</sub>O<sub>3</sub> nanoparticles, THP-1 cells were primed  
520 by 1 µg/mL phorbol 12-myristate acetate overnight<sup>7</sup>. For cellular exposure, Fe<sub>2</sub>O<sub>3</sub>  
521 nanoparticles were dispersed in complete RPMI 1640 medium at desired  
522 concentrations. Control sample was prepared by replacing the nanoparticle  
523 suspensions with pure water.

524

## 525 **Nontargeted metabolomics via LC-MS**

526 THP-1 cells were exposed to 100 µg/mL Fe<sub>2</sub>O<sub>3</sub> nanoparticles for 24 h, and 9 cell  
527 samples including control and particle treatments were harvested and lyzed in cold  
528 lysis buffer (1.5 mL) by a probe sonication. After centrifugation at 20, 000 g for 10



529 min, the lysis supernatants were collected and extracted by 80% methanol containing  
530 0.5mM L-Methionine-(methyl-13C,d3) and 1mM D-Glucose-1,2,3,4,5,6,6-d7 as  
531 internal standards. Dried metabolite pellets were re-suspended in 120  $\mu$ L of buffer A  
532 (0.1% formic acid in 95:5 water/ACN) and 5  $\mu$ L aliquots were injected for  
533 nontargeted LC-MS on a Shimadzu UFLC-XR system (Shimadzu Corporation, Japan)  
534 and an AB SCIEX TripleTOF 5600+ system (AB SCIEX, Foster City, CA). Samples  
535 were separated on a C18 reversed phase HPLC column (2.1mm  $\times$  100mm, 100 $\text{\AA}$ ,  
536 1.7 $\mu$ m, Waters, Milford, MA) at 350  $\mu$ L/min with a liner gradient of buffer A and  
537 buffer B (100% ACN) as follows: isocratic conditions at 100% A (0%B) for 1min, a  
538 linear gradient from 100%A (0%B) to 30% A (70%B) over 2 min, a linear gradient  
539 from 30%A (70%B) to 0% A (100%B) over 7 min, isocratic conditions at 100% B for  
540 2 min. The column temperature maintained at 50  $^{\circ}$ C.

541

542 To acquire the MS data, the mass spectrometry conditions were set as follows: the ion  
543 spray voltage was +5.5kV (positive ion mode) or -4.5kV (negative ion mode); turbo  
544 spray temperature was 550  $^{\circ}$ C; nebulizer, heater and curtain gases were at 50, 50 and  
545 30 psi, respectively; TOF MS was scanned at the mass range of m/z 50 ~ 1200.  
546 Analyst v1.6.0 software (AB Sciex) was used to collected raw data, which was further  
547 converted into mzXML data format by proteoWizard software (Spielberg Family  
548 Center for Applied Proteomics, Los Angeles, CA) for further data processing.

549

550 The XCMS platform (<https://metlin.scripps.edu/xcms/>) was used for peak detection,  
551 retention time collection and alignment. All data-collection parameters were set to the  
552 “UPLC Triple TOF” default values. Retention times (RT), m/z values and peak  
553 intensities of metabolites were exported to an Excel spreadsheet for processing. The  
554 peak intensities were normalized to the internal standards: L-Methionine-(methyl-13C,  
555 d3) (m/z, 154.077) for positive mode and D-Glucose-1,2,3,4,5,6,6-d7 (m/z, 186.099)  
556 for negative mode. Preprocessed data sets were analyzed using Matlab (MathWorks,  
557 Natick, MA) and Metaboanalyst ([www.metaboanalyst.ca](http://www.metaboanalyst.ca)) to perform scatter plot, heat  
558 map, cluster and ANOVA analysis. Euclidean distance (ED) is used to measure the

559 dissimilarity of samples with multivariate variables<sup>29</sup>. Here, the ED between control  
560 and nanoparticle-treated samples is defined by the length between the two cluster  
561 centers. It was calculated by SPSS using following  
562 formula:  $ED(C, T) = \sqrt{(t1 - c1)^2 + (t2 - c2)^2 + \dots + (tn - cn)^2}$ , where  $t_n$  and  $c_n$   
563 are the log-transformed normalized peak intensities of metabolite  $n$  in  
564 nanoparticle-treated sample and control sample, respectively ( $n=2854$ ).

565

### 566 **Proteomics via nanoflow LC-MS/MS**

567 The cell samples exposed to  $Fe_2O_3$  nanoparticles were harvested and lyzed. After  
568 centrifugation at 20000 g, the lysis supernatants (1 mL) were added to 8 mL  
569 extraction solute (acetone/ethanol/acetic acid 50:50:0.1), which was pre-cooled at  
570  $-20\text{ }^\circ\text{C}$ . The mixture was stored at  $4\text{ }^\circ\text{C}$  for 24 h. Then the proteins were collected by  
571 centrifugation at 20000 g for 30 min. After re-dissolution, the protein concentrations  
572 in all the samples were equivalent by a Bradford method, and then the protein samples  
573 were denaturalized, digested and desalted according to a reported method<sup>44</sup>. Finally,  
574 the resulting peptide samples were re-dissolved in 200  $\mu\text{L}$  0.1% formic acid for nano-  
575 LC-MS/MS analysis.

576

577 A LTQ Orbitrap Velos was equipped with an Accela 600 HPLC system (Thermo, San  
578 Jose, CA) to establish the nano-LC-MS/MS system. The peptide samples were  
579 injected into a capillary trap column (200 mm i.d.  $\times$  4 cm, 120  $\text{\AA}$ , 5 mm), and then  
580 separated on an analytical column (15 cm  $\times$  75 mm i.d., 3 mm, 120  $\text{\AA}$ ). Both of the  
581 columns were packed with C18 AQ beads. The separation buffer consisted of 0.1%  
582 (v/v) formic acid in DI  $H_2O$  (buffer A) and 0.1% (v/v) formic acid in acetonitrile  
583 (ACN) as buffer B. The nano-LC-MS/MS analysis was performed based on a  
584 previously reported method<sup>43</sup>. All of the mass spectra were collected in a data  
585 dependent mode.

586

587 The resulted raw files were searched in MaxQuant (Version1.3.0.5) using Integrated



588 Uniprot protein fasta database of human. Peptide searching was constrained using  
589 fully tryptic cleavage, allowing less than 2 missed cleavages sites for tryptic digestion.  
590 Variable modifications included methionine oxidation, acetylation of protein N-term  
591 and phosphorylation (STY). Precursor ion and fragment ion mass tolerances were set  
592 as 5 ppm and 0.08 Da, respectively. The false discovery rate (FDR) for peptide and  
593 protein were less than 1% and peptide identification required a minimum length of six  
594 amino acids. The cell pathways and functions related to the identified differential  
595 proteins were explored by KEGG (<http://www.kegg.jp/>) and UniprotKB  
596 (<http://www.uniprot.org/help/uniprotkb>) database.

597

### 598 **IL-1 $\beta$ and TNF-alpha Detection by ELISA**

599 IL-1 $\beta$  and TNF-alpha productions were detected in the culture media of THP-1 cells  
600 using human IL-1 $\beta$  and TNF-alpha ELISA Kit (BD; San Jose, CA, USA). Briefly,  
601 aliquots of  $5 \times 10^4$  THP-1 cells were seeded in 0.1 mL complete medium and primed  
602 with 1  $\mu\text{g}/\text{mL}$  phorbol 12-myristate acetate (PMA) overnight in 96-well plates  
603 (Corning; Corning, NY, USA). Cells were treated with the desired concentration of  
604 the particle suspensions made up in complete RPMI 1640 medium, supplemented  
605 with 10% fetal bovine serum and 10 ng/mL lipopolysaccharide (LPS).

606

### 607 **Cell migration assay**

608 THP-1 cells were pretreated or not with 100  $\mu\text{M}$  bindarit for 3 h before exposure to  
609 100  $\mu\text{g}/\text{mL}$  Fe<sub>2</sub>O<sub>3</sub> nanoparticles. After 24 h incubation, the supernatants were  
610 collected for MCP-1 detection or cell migration assay, which was performed in  
611 24-transwell plates with polycarbonate membranes of 8  $\mu\text{m}$  pores (Corning, NY,  
612 USA). Lower wells were filled with 500  $\mu\text{L}$  aliquots of the collected supernatants, and  
613  $2 \times 10^5$  THP-1 cells (100 $\mu\text{L}$ ) were seeded into each of the upper wells. After  
614 incubation for 6h, nonmigrated cells were scraped off from the upper side of the  
615 membrane and cells remaining within the pores or below the membranes were stained  
616 with Diff Quick<sup>35</sup>. Cell numbers were calculated under microscope by randomly  
617 selecting at least 5 individual fields for each sample.

618

### 619 **TEM imaging of Fe<sub>2</sub>O<sub>3</sub> particles in THP-1 cells**

620 After exposure to 25 µg/mL Fe<sub>2</sub>O<sub>3</sub> for 24 h, THP-1 cells were collected, washed and  
621 fixed with 2% glutaraldehyde in PBS. After 1 h post-fixation staining in 1% osmium  
622 tetroxide, a dehydration process was performed by treating the cells in a graded series  
623 of ethanol, propylene oxide, and finally the cell pellets were embedded in Epon. A  
624 Reichert-Jung Ultracut E ultramicrotome was used to cut the TEM sections with  
625 approximately 50-70 nm thickness. The sections were further stained with uranyl  
626 acetate and Reynolds lead citrate before examining on TEM as previously reported<sup>42</sup>.

627

### 628 **Confocal microscopy imaging**

629 Leica confocal SP2 1P/FCS microscopes were used to visualize Fe<sub>2</sub>O<sub>3</sub> uptake and  
630 cathepsin B release in THP-1 cells. High magnification images were obtained under  
631 the 63X objective. To visualize the cellular distribution, THP-1 cells were treated with  
632 25 µg/mL FITC-labeled Fe<sub>2</sub>O<sub>3</sub> nanoparticles for 6 h, fixed and stained with Hoechst  
633 33342 and Alexa Fluor 594 labeled antibodies to visualize nuclei and lysosomes,  
634 respectively. For cathepsin B imaging, cells exposed to 100 µg/mL Fe<sub>2</sub>O<sub>3</sub> particles for  
635 16 h were stained with Magic Red™ Cathepsin B kit and Hoechst 33342 for confocal  
636 microscopy imaging.

637

638

### 639 **Inflammation test in mouse lungs**

640 Mice were exposed to nanoparticle suspensions using oropharyngeal aspiration at 2  
641 mg/kg. Eight-week-old male C57Bl/6 mice purchased from Soochow University were  
642 used for animal experiments. All animals were housed under standard laboratory  
643 conditions that have been set up according to Soochow University guidelines for care  
644 and treatment of laboratory animals. These conditions were approved by the  
645 Chancellor's Animal Research Committee at Soochow University and include  
646 standard operating procedures for animal housing (filter-topped cages; room  
647 temperature at 23 ± 2 °C; 60% relative humidity; 12 h light, 12 h dark cycle) and

648 hygiene status (autoclaved food and acidified water). Animals were exposed by  
649 oropharyngeal aspiration as described by us<sup>8</sup>. Briefly, animals were anesthetized by  
650 intraperitoneal injection of ketamine (100 mg/kg)/xylazine (10 mg/kg) in a total  
651 volume of 100  $\mu$ L. The anesthetized animals were held in a vertical position. 50  $\mu$ L  
652 aliquots of the nanoparticle suspensions in PBS were instilled at the back of the  
653 tongue to allow pulmonary aspiration of a dose of 2 mg/kg. Each experiment included  
654 control animals, which received the same volume of PBS. The positive control in each  
655 experiment received 5 mg/kg quartz. Each group included six mice. The mice were  
656 sacrificed after 40 h exposure. BALF and lung tissue were collected as previously  
657 described. The BALF was used for performance of total and differential cell counts  
658 and measurement of IL-1 $\beta$ , TNF- $\alpha$ , MCP-1 and LIX levels. Lung tissue was stained  
659 with hematoxylin/eosin.

660

### 661 **Statistical Analysis**

662 All the experiments were repeated at least thrice with 3-6 replicates. Error bars  
663 represent the standard deviations (s.d.). All the cell and animal samples were  
664 randomly allocated into experimental groups by drawing lots. All the experiments  
665 were repeated at least thrice with 3–6 replicates. Results were expressed as mean  $\pm$   
666 SD of multiple determinations from at least three separate experiments. One-way  
667 ANOVA or Student t test was used for statistical analysis in MetaboAnalyst 3.0 and  
668 excel 2010. The difference is regarded statistically significant with  $p \leq 0.01$  and  
669  $FDR \leq 0.05$ . Correlation analysis of the differential proteins and metabolites was  
670 performed in Matlab R2009b. The correlation is considered as statistically significant  
671 with correlation coefficient ( $r$ )  $\leq -0.8$  or  $r \geq 0.8$ , and  $p \leq 0.01$ . The Euclidean distance  
672 (ED) and linear regression analysis of the EDs and particle properties were achieved  
673 in SPSS 18.0. The 3D profile of the Structure-Activity relationships was also done in  
674 Matlab.

675

### 676 **Data availability**

677 The data that support the plots within this paper and other findings of this study are

678 available from the corresponding author on reasonable request.

679

## 680 **References**

681

682 1. Nel, A. E. *et al.* Understanding biophysicochemical interactions at the nano-bio interface. *Nat.*  
683 *Mater.* **8**, 543-557 (2009).

684

685 2. Nel, A. *et al.* Nanomaterial toxicity testing in the 21st century: Use of a predictive  
686 toxicological approach and high-throughput screening. *Accounts Chem. Res.* **46**, 607-621  
687 (2013).

688

689 3. Malysheva, A., Lombi, E. & Voelcker, N. H. Bridging the divide between human and  
690 environmental nanotoxicology. *Nat. Nanotechnol.* **10**, 835-844 (2015).

691

692 4. Oh, E. *et al.* Meta-analysis of cellular toxicity for cadmium-containing quantum dots. *Nat.*  
693 *Nanotechnol.* **11**, 479-486 (2016).

694

695 5. Fang, G. *et al.* Differential pd-nanocrystal facets demonstrate distinct antibacterial activity  
696 against gram-positive and gram-negative bacteria. *Nat. Commun.* **9**, 129 (2018).

697

698 6. Li, R. *et al.* Identification and optimization of carbon radicals on hydrated graphene oxide for  
699 ubiquitous antibacterial coatings. *ACS Nano* **10**, 10966-10980 (2016).

700

701 7. Li, R. *et al.* Surface charge and cellular processing of covalently functionalized multiwall  
702 carbon nanotubes determine pulmonary toxicity. *ACS Nano* **7**, 2352-2368 (2013).

703

704 8. Cai, X. *et al.* Reduction of pulmonary toxicity of metal oxide nanoparticles by  
705 phosphonate-based surface passivation. *Part. Fibre Toxicol.* **14**, 13 (2017).

706

707 9. Brown, S. A., Sandhu, N. & Herrmann, J. Systems biology approaches to adverse drug effects:  
708 The example of cardio-oncology. *Nat. Rev. Clin. Oncol.* **12**, 718-731 (2015).

709

710 10. Shi, J. J., Kantoff, P. W., Wooster, R. & Farokhzad, O. C. Cancer nanomedicine: Progress,  
711 challenges and opportunities. *Nat. Rev. Cancer* **17**, 20-37 (2017).

712

713 11. Tenzer, S. *et al.* Rapid formation of plasma protein corona critically affects nanoparticle  
714 pathophysiology. *Nat. Nanotechnol.* **8**, 772-U1000 (2013).

715

716 12. Duan, J. C. *et al.* Quantitative profiling of protein s-glutathionylation reveals redox-dependent  
717 regulation of macrophage function during nanoparticle-induced oxidative stress. *ACS Nano* **10**,  
718 524-538 (2016).

719

720 13. Tsimbouri, P. M. *et al.* Stimulation of 3d osteogenesis by mesenchymal stem cells using a  
721 nanovibrational bioreactor. *Nat. Biomed. Eng.* **1**, 758-770 (2017).

722

723 14. Hofmann, D. *et al.* Mass spectrometry and imaging analysis of nanoparticle-containing  
724 vesicles provide a mechanistic insight into cellular trafficking. *ACS Nano* **8**, 10077-10088  
725 (2014).

726

727 15. Ali, M. R. K. *et al.* Simultaneous time-dependent surface-enhanced raman spectroscopy,  
728 metabolomics, and proteomics reveal cancer cell death mechanisms associated with gold  
729 nanorod photothermal therapy. *J. Am. Chem. Soc.* **138**, 15434-15442 (2016).

730

731 16. Bai, X. *et al.* Toward a systematic exploration of nano-bio interactions. *Toxicol. Appl.*  
732 *Pharmacol.* **323**, 66-73 (2017).

733

734 17. Ebrahim, A. *et al.* Multi-omic data integration enables discovery of hidden biological  
735 regularities. *Nat. Commun.* **7**, 13091 (2016).

736

737 18. Vipulanandan, C. & Mohammed, A. Smart cement modified with iron oxide nanoparticles to  
738 enhance the piezoresistive behavior and compressive strength for oil well applications. *Smart*  
739 *Mater. Struct.* **24**, 11 (2015).

740

741 19. Abd El-Wahab, H. *et al.* Preparation and evaluation of nanosized mixed calcium iron oxide  
742 (cafe<sub>2</sub>o<sub>4</sub>) as high heat resistant pigment in paints. *Pigm. Resin. Technol.* **44**, 172-178 (2015).

743

744 20. Felfoul, O. *et al.* Magneto-aerotactic bacteria deliver drug-containing nanoliposomes to  
745 tumour hypoxic regions. *Nat. Nanotechnol.* **11**, 941-947 (2016).

746

747 21. Zanganeh, S. *et al.* Iron oxide nanoparticles inhibit tumour growth by inducing  
748 pro-inflammatory macrophage polarization in tumour tissues. *Nat. Nanotechnol.* **11**, 986-994  
749 (2016).

750

751 22. Zhao, H. *et al.* Lanthanide hydroxide nanoparticles induce angiogenesis via ros-sensitive  
752 signaling. *Small* **12**, 4404-4411 (2016).

753

754 23. Lin, S. *et al.* Aspect ratio plays a role in the hazard potential of ceo<sub>2</sub> nanoparticles in mouse  
755 lung and zebrafish gastrointestinal tract. *ACS Nano* **8**, 4450-4464 (2014).

756

757 24. George, S. *et al.* Surface defects on plate-shaped silver nanoparticles contribute to its hazard  
758 potential in a fish gill cell line and zebrafish embryos. *ACS Nano* **6**, 3745-3759 (2012).

759

760 25. Tsoi, K. M. *et al.* Mechanism of hard-nanomaterial clearance by the liver. *Nat. Mater.* **15**,  
761 1212-1221 (2016).

762

763 26. Zhang, H. *et al.* Pdo doping tunes band-gap energy levels as well as oxidative stress responses  
764 to a co(3)o(4) p-type semiconductor in cells and the lung. *J. Am. Chem. Soc.* **136**, 6406-6420  
765 (2014).

- 766  
767 27. Rehman, S. *et al.* Facile synthesis of anisotropic single crystalline alpha- $\text{Fe}_2\text{O}_3$  nanoplates and  
768 their facet-dependent catalytic performance. *Inorg. Chem. Front.* **2**, 576-583 (2015).  
769  
770 28. Li, R. *et al.* Surface interactions with compartmentalized cellular phosphates explain rare earth  
771 oxide nanoparticle hazard and provide opportunities for safer design. *ACS Nano* **8**, 1771-1783  
772 (2014).  
773  
774 29. Shah, P. *et al.* A microfluidics-based in vitro model of the gastrointestinal human-microbe  
775 interface. *Nat. Commun.* **7**, 11535 (2016).  
776  
777 30. Sevin, D. C. & Sauer, U. Ubiquinone accumulation improves osmotic-stress tolerance in  
778 *Escherichia coli*. *Nat. Chem. Biol.* **10**, 266-272 (2014).  
779  
780 31. Hughes, C. S. *et al.* Extracellular cathepsin S and intracellular caspase 1 activation are  
781 surrogate biomarkers of particulate-induced lysosomal disruption in macrophages. *Part. Fibre*  
782 *Toxicol.* **13**, 13 (2016).  
783  
784 32. Arighi, C. N. *et al.* Role of the mammalian retromer in sorting of the cation-independent  
785 mannose 6-phosphate receptor. *J. Cell Biol.* **165**, 123-133 (2004).  
786  
787 33. Salio, M. *et al.* Saposins modulate human invariant natural killer T cells self-reactivity and  
788 facilitate lipid exchange with CD1d molecules during antigen presentation. *Proc. Natl. Acad.*  
789 *Sci. U. S. A.* **110**, E4753-E4761 (2013).  
790  
791 34. Duewell, P. *et al.* Nlrp3 inflammasomes are required for atherogenesis and activated by  
792 cholesterol crystals. *Nature* **464**, 1357-1361 (2010).  
793  
794 35. Pruessmeyer, J. *et al.* Leukocytes require Adam10 but not Adam17 for their migration and  
795 inflammatory recruitment into the alveolar space. *Blood* **123**, 4077-4088 (2014).  
796  
797 36. Reategui, E. *et al.* Microscale arrays for the profiling of start and stop signals coordinating  
798 human-neutrophil swarming. *Nat. Biomed. Eng.* **1**, 0094 (2017).  
799  
800 37. Zhang, H. *et al.* Use of metal oxide nanoparticle band gap to develop a predictive paradigm  
801 for oxidative stress and acute pulmonary inflammation. *ACS Nano* **6**, 4349-4368 (2012).  
802  
803 38. Kim, S. E. *et al.* Ultrasmall nanoparticles induce ferroptosis in nutrient-deprived cancer cells  
804 and suppress tumour growth. *Nat. Nanotechnol.* **11**, 977-985 (2016).  
805  
806 39. Lu, J. Q. *et al.* Nano-enabled pancreas cancer immunotherapy using immunogenic cell death  
807 and reversing immunosuppression. *Nat. Commun.* **8**, 1811 (2017).  
808  
809 40. Li, Z. *et al.* Direct hydrothermal synthesis of single-crystalline hematite nanorods assisted by

- 810 1,2-propanediamine. *Nanotechnology* **20**, 245603 (2009).  
811  
812 41. Chen, L. *et al.* Continuous shape- and spectroscopy-tuning of hematite nanocrystals. *Inorg.*  
813 *Chem.* **49**, 8411-8420 (2010).  
814  
815 42. Li, R. *et al.* Enhancing the imaging and biosafety of upconversion nanoparticles through  
816 phosphonate coating. *ACS Nano* **9**, 3293-3306 (2015).  
817  
818 43. Wisniewski, J. R., Zougman, A., Nagaraj, N. & Mann, M. Universal sample preparation  
819 method for proteome analysis. *Nat. Methods* **6**, 359-362 (2009).  
820  
821 44. Liu, J. *et al.* High-sensitivity n-glycoproteomic analysis of mouse brain tissue by protein  
822 extraction with a mild detergent of n-dodecyl beta-d-maltoside. *Anal. Chem.* **87**, 2054-2057  
823 (2015).  
824

## 825 **Acknowledgements**

826 This work was supported by the grant from the National Natural Science Foundation  
827 of China (No. 31671032), Key Project of Natural Science Foundation of the Higher  
828 Education Institutions of Jiangsu Province (No. 17KJA310003), and a project funded  
829 by the Priority Academic Program Development of Jiangsu Higher Education  
830 Institutions (PAPD). R.L. is supported by the recruitment program of Global Youth  
831 Experts of China.

832

## 833 **Author contributions**

834 X.C., Z.J. and R.L. conceived and designed the study; X.C. did most experiments; Z.J.  
835 synthesized the Fe<sub>2</sub>O<sub>3</sub> nanoparticles, and performed TEM, XRD, Zeta potential and  
836 hydrodynamic size characterization with H.Z.; J. D. performed the LC-MS analysis  
837 for metabolomics study; F. W. and J. L. contributed to the proteomics analysis. The  
838 writing of the paper was led by X. C. and R.L with participation from Z.J. and C.K.

839

## 840 **Additional information**

841 Supplementary information is available in the online version of the paper. Reprints  
842 and permissions information is available online at [www.nature.com/reprints](http://www.nature.com/reprints).  
843 Publisher's note: Springer Nature remains neutral with regard to jurisdictional claims

844 in published maps and institutional affiliations. Correspondence and requests for  
845 materials should be addressed to R.L. and Z.J.

846

847 **Competing interests:** The authors declare no competing financial interests.

848
